# Supplementary material
Source: Springer Nature journal article supplement (https://www.springermedizin.de/resource/supplementary/12894_2011_199_MOESM3_ESM.pdf/9513266)
Supplement: MOESM3 [file 9513266]

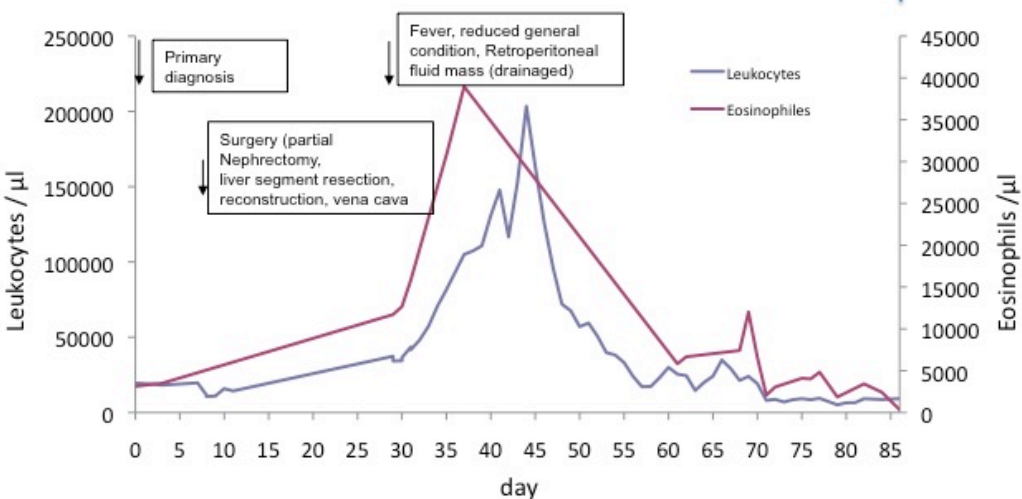

Hydrocortisone (mg/day)

60

Temsirolimus (mg/week)

25

25

25

25

25

25

Sunitinib (mg/day)

50

50

Prednisolone (mg/day)

100

50

30

50

Hydroxyurea (g/day)

2

2

3

Vincristine (mg/day)

2

(single dose)

Cytarabine (mg/day)

150

(2 doses)
